# Supplementary material
Source: PubMed Central journal article supplement (PMC4128237)
Supplement: NIHMS606506-supplement-02.pdf [file NIHMS606506-supplement-02.pdf]

# Supplemental File 2

## MIAPE: Gel Informatics

Version 1.0, July, 2009

### Reporting requirements for gel informatics data

#### 1. General features

- 1.1 Date stamp: 2013-03-26
- 1.2 Responsible person or institutional role: Todd M. Umstead, Senior Research Support Associate, Penn State Center for Host defense, Inflammation, and Lung Disease (CHILD) Research, Department of Pediatrics, P.O. Box 850, Hershey, PA 17033
- 1.3 Electrophoresis type: 2D-DIGE with PAGE electrophoresis
- 1.4 Electrophoresis context: Differences in the Mouse Alveolar Macrophage (mAM) proteome for vehicle treated SP-A (-/-) (knockout) male mice (KOM+VEH), vehicle treated SP-A (-/-) (knockout) female mice (KOF+VEH), KO male mice treated with 10 µg SP-A1 (KOM+SPA1), KO female mice treated with 10 µg SP-A1 (KOF+SPA1), KO male mice treated with 10 µg SP-A2 (KOM+SPA2), KO female mice treated with 10 µg SP-A2 (KOF+SPA2), KO male mice treated with 5 µg SP-A1 and 5 µg SP-A2 (KOM+5SPA1/2), KO female mice treated with 5 µg SP-A1 and 5 µg SP-A2 (KOF+5SPA1/2), KO male mice treated with 10 µg SP-A1 and 10 µg SP-A2 (KOM+10SPA1/2), KO female mice treated with 10 µg SP-A1 and 10 µg SP-A2 (KOF+10SPA1/2), vehicle treated hTG SP-A2 male mice (SPA2M+VEH), vehicle treated hTG SP-A2 female mice (SPA2F+VEH), hTG SP-A2 male mice treated with 10 µg SP-A1 (SPA2M+SPA1), hTG SP-A2 female mice treated with 10 µg SP-A1 (SPA2F+SPA1), vehicle treated wild-type male mice (WTM+VEH), and vehicle treated wild-type female mice (WTF+VEH)
- 1.5 Image(s): Available upon request
- 1.6 Image analysis software: Progenesis SameSpots v4.0 (Nonlinear Dynamics)
- 1.7 Statistical analysis software: Progenesis SameSpots v4.0 (Nonlinear Dynamics), Excel (Microsoft)

#### 2. Gel analysis design

- 2.1 Type: Directed
- 2.2 Replicates: n=4 per group
- 2.3 Groups: 16 groups (vehicle treated SP-A (-/-) (knockout) male mice, vehicle treated SP-A (-/-) (knockout) female mice, KO male mice treated with 10 µg SP-A1, KO female mice treated with 10 µg SP-A1, KO male mice treated with 10 µg SP-A2, KO female mice treated with 10 µg SP-A2, KO male mice treated with 5 µg SP-A1 and 5 µg SP-A2, KO female mice treated with 5 µg SP-A1 and 5 µg SP-A2, KO male mice treated with 10 µg SP-A1 and 10 µg SP-A2, KO female mice treated with 10 µg SP-A1 and 10 µg SP-A2, vehicle treated hTG SP-A2 male mice, vehicle treated hTG SP-A2 female mice, hTG SP-A2 male mice treated with 10 µg SP-A1, hTG SP-A2 female mice treated with 10 µg SP-A1, vehicle treated wild-type male mice, and vehicle treated wild-type female mice)
- 2.4 Internal standard: Cy2 normalization pool of equal amount of protein from all study samples run on each analytical gel
- 2.5 External standard: Cy3/Cy5 counterbalancing to eliminate dye-based artefacts

#### 3. Image preparation

- 3.1 Software: ImageQuant TL (GE)
- 3.2 Preparation steps: Images obtained using the Typhoon 9410 Variable Mode Imager (GE Healthcare) in the GEL file format (.gel)
  - 3.2.1 Analytical (quantitative) gels: Laser voltages were optimized for each fluorophore prior to scanning to avoid signal saturation. Identical laser settings were then used to scan each gel
  - 3.2.2 Preparative/picking gels: Fixed with ethanol/acetic acid and post-stained with Deep Purple Total Protein Stain (GE), scanned independently from analytical gels; or silver stained using SilverQuest Silver Stain Kit (Life Technologies) and photographed using a Nikon CoolPix 4500 digital camera
  - 3.2.3 All gels were scanned at 100 µm resolution

3.2.4 See MIAPE Gel Electrophoresis supplement for more specific details of image collection

#### **4. Image analysis pre-processing**

- 4.1 Input image(s): Images obtained using the Typhoon 9410 Variable Mode Imager (GE) in the GEL file format (.gel)
- 4.2 Software: ImageQuant TL (GE)
- 4.3 Processing steps: See image preparation above

#### **5. Data extraction process**

- 5.1 Input image(s): Images obtained using the Typhoon 9410 Variable Mode Imager (GE) in the GEL file format (.gel) and are available upon request
- 5.2 Image quality control: Image QC done using Progenesis SameSpots v4.0 (Nonlinear Dynamics) to check images for bit depth, color, manipulation prior to analysis, proper file type, saturation, low dynamic range, and stretched contrast
- 5.3 Image alignment
  - 5.3.1 Automatic gel alignment using Progenesis SameSpots v4.0 (Nonlinear Dynamics) to allow for more accurate spot matching
  - 5.3.2 Gel alignment manually edited following automated alignment protocols
- 5.4 Feature detection
  - 5.4.1 Automatic spot detection using Progenesis SameSpots v4.0 (Nonlinear Dynamics)
  - 5.4.2 Features were manually edited following automated spot detection protocols
- 5.5 Matching
  - 5.5.1 Algorithm: Progenesis SameSpots v4.0 (Nonlinear Dynamics)
  - 5.5.2 Reference image(s) used: 13779 Standard Cy2 aligned
  - 5.5.3 Landmarks: Vectors were automatically and manually placed
  - 5.5.4 Match editing: Automatic spot matching using Progenesis SameSpots v4.0 (Nonlinear Dynamics) followed by manual edited to confirm matches
  - 5.5.5 One-hundred percent spot matching across all gels without missing values was set as a requirement for spot inclusion for data analysis
- 5.6 Feature quantitation
  - 5.6.1 Type: Normalized Volume
  - 5.6.2 Quantitation: Progenesis SameSpots v4.0 (Nonlinear Dynamics)
  - 5.6.3 Background subtraction: N/A
  - 5.6.4 Normalization: Progenesis SameSpots v4.0 (Nonlinear Dynamics)

#### **6. Data analysis**

- 6.1 Analysis intent: Features with ANOVA ( $p < 0.05$ ) and/or t-test ( $p < 0.05$ ) Software: Progenesis SameSpots v4.0 (Nonlinear Dynamics), Excel (Microsoft)
- 6.2 Type: ANOVA with false-discovery rates based on Progenesis assigned q-value, t-test, principal component analysis (PCA), power calculations, dendrogram
- 6.3 Parameters: Not blinded
- 6.4 Input data: Normalized volume (Cy3/Cy2 and Cy5/Cy2)

#### **7. Data reporting**

- 7.1 List of image features: Excel file available upon request
- 7.2 List of matches: Excel file available upon request
- 7.3 Description of analysis results: Excel file available upon request
