# Supplementary material
Source: PubMed Central journal article supplement (PMC4128237)
Supplement: NIHMS606506-supplement-04.pdf [file NIHMS606506-supplement-04.pdf]

## Supplementary File 4

Protein names and cross references to accession numbers and categories.

| Gel No. | Protein Name                                                             | NCBI GI Number | Swiss-Prot Access. No. | Functional Categories | Refs. |
|---------|--------------------------------------------------------------------------|----------------|------------------------|-----------------------|-------|
| 1       | 14-3-3 protein alpha/beta                                                | gi 31543974    | Q9CQV8                 | RDP, ARC              | 34,35 |
| 2       | 14-3-3 protein epsilon                                                   | gi 226874906   | P62259                 | RDP, ARC              | 34,35 |
| 3       | 14-3-3 protein gamma                                                     | gi 31543976    | P61982                 | RDP, ARC              | 34,35 |
| 4       | 14-3-3 protein zeta/delta                                                | gi 6756041     | P63101                 | RDP, ARC              | 34,35 |
| 5       | 65-kDa macrophage protein                                                | gi 984636      | Q61233                 | ARC                   | 36    |
| 6       | 6-phosphogluconolactonase                                                | gi 13384778    | Q9CQ60                 | OX                    | 37,38 |
| 7       | Actin-related protein 3                                                  | gi 12835802    | Q99JY9                 | ARC                   | 39    |
| 8       | Actr2 protein                                                            | gi 29126784    | P61161                 | ARC                   | 39    |
| 9       | Alpha-actinin-1                                                          | gi 46395721    | Q7TPR4                 | ARC                   | 40    |
| 10      | Alpha-fetoprotein                                                        | gi 191765      | P07724                 | ROI                   | 41    |
| 11      | Annexin A2                                                               | gi 6996913     | P07356                 | ARC, ROI, OX          | 42-45 |
| 12      | Annexin A4                                                               | gi 33416530    | Q7TMN7                 | ROI                   | 46    |
| 13      | Anxa 5 protein                                                           | gi 13277612    | P48036                 | ROI                   | 47,48 |
| 14      | ArsA arsenite transporter, ATP-binding, homolog 1                        | gi 12025542    | O54984                 |                       |       |
| 15      | Atp5b protein                                                            | gi 23272966    | P56480                 | OX                    | 49    |
| 16      | Calpain, small subunit 1                                                 | gi 110227381   | O88456                 | ARC, PBCF             | 50,51 |
| 17      | Calreticulin                                                             | gi 6680836     | P14211                 | PBCF, ROI, RDP        | 52,53 |
| 18      | Capping protein (actin filament) muscle Z-line, alpha 2 (CapZ alpha-2)   | gi 6671672     | P47754                 | ARC                   | 54,55 |
| 19      | Capping protein (actin filament) muscle Z-line, beta isoform (CapZ beta) | gi 83649737    | P47757                 | ARC                   | 54,55 |
| 20      | Cathepsin D precursor                                                    | gi 6753556     | P18242                 | PBCF, OX              | 56,57 |
| 21      | Cathepsin S                                                              | gi 160707996   | O70370                 | PBCF                  | 58    |
| 22      | Chaperonin subunit 2 (beta) (CCT2)                                       | gi 126521835   | Q542X7                 | ARC,PBCF              | 59,60 |
| 23      | Chia protein                                                             | gi 15029822    | Q91XA9                 | ROI                   | 61    |
| 24      | Chitinase 3-like 3 precursor (Ym1)                                       | gi 254281348   | O35744                 | ROI                   | 61    |
| 25      | Chloride intracellular channel 1                                         | gi 15617203    | Q9Z1Q5                 | ARC, PBCF, OX         | 62,63 |
| 26      | Chloride intracellular channel 4 (mitochondrial)                         | gi 7304963     | Q9QYB1                 | ARC, OX               | 64,65 |
| 27      | CNDP dipeptidase 2                                                       | gi 31981273    | Q9D1A2                 | PBCF                  | 66    |
| 28      | Coatomer subunit epsilon                                                 | gi 10946972    | O89079                 |                       |       |
| 29      | Cytochrome b-c1 complex subunit 1, mitochondrial                         | gi 46593021    | Q9CZ13                 |                       |       |

|    |                                                        |              |        |                    |             |
|----|--------------------------------------------------------|--------------|--------|--------------------|-------------|
| 30 | EF hand domain containing 2                            | gi 31981086  | Q8C845 |                    |             |
| 31 | Endoplasmic reticulum resident protein 29              | gi 19526463  | P57759 | PBCF               | 67          |
| 32 | Eno1 protein (Alpha-enolase)                           | gi 34784434  | Q6PHC1 | ARC, PBCF, ROI     | 46,68,69    |
| 33 | Ezrin                                                  | gi 50881     | P26040 | ARC                | 70          |
| 34 | F-actin capping protein alpha-1 subunit (CapZ alpha-1) | gi 161086971 | P47753 | ARC                | 54,55       |
| 35 | Ferritin heavy chain 1                                 | gi 6753912   | P09528 | OX                 | 71          |
| 36 | Ferritin light chain 1                                 | gi 114326466 | Q9CPX4 | OX                 | 71          |
| 37 | Gamma-actin (cytoplasmic actin 2)                      | gi 809561    | P63260 | ARC, OX            | 72,73       |
| 38 | Gelsolin precursor                                     | gi 28916693  | P13020 | ARC, OX            | 72,73       |
| 39 | Glucose-6-phosphate dehydrogenase X-linked             | gi 6996917   | Q00612 | OX                 | 74          |
| 40 | Glucosidase 2 subunit beta                             | gi 86198316  | P08003 |                    |             |
| 41 | Guanine deaminase                                      | gi 6753960   | Q9R111 | ARC                | 75          |
| 42 | Heat shock protein 1, beta (HSP90AB1)                  | gi 40556608  | Q71LX8 | ARC, OX, PBCF, ROI | 73,76-78    |
| 43 | Heat shock protein 5 precursor (GRP78)                 | gi 254540166 | P20029 | OX, PBCF, ROI      | 71,76,79,80 |
| 44 | Heat shock protein 65 (HSP60)                          | gi 51455     | P63038 | PBCF, ROI          | 76,80,81    |
| 45 | Heat shock protein 8 (HSC70; HSC71)                    | gi 42542422  | P63017 | PBCF, ROI          | 76,80       |
| 46 | Heat shock protein 90, beta (Grp94), member 1          | gi 14714615  | Q91V38 | OX, PBCF, ROI      | 76,80       |
| 47 | Hematopoietic cell specific Lyn substrate 1            | gi 255760028 | Q922I8 | ARC, ROI           | 82,83       |
| 48 | Heme-binding protein                                   | gi 3724328   | Q9R257 | ROI                | 84          |
| 49 | Heterogeneous nuclear ribonucleoprotein K              | gi 13384620  | P61979 | RDP                | 85          |
| 50 | Heterogeneous nuclear ribonucleoprotein C1/C2          | gi 8393544   | Q9Z204 | RDP                | 86          |
| 51 | High mobility group 1 protein                          | gi 600761    | P63158 | RDP, ROI           | 87          |
| 52 | Hnrpf protein                                          | gi 58476100  | Q9Z2X1 | RDP                | 88          |
| 53 | Kappa-B motif-binding phosphoprotein                   | gi 1083569   | Q9YH06 | RDP                | 89          |
| 54 | Keratin type II                                        | gi 511654    | P11679 | ARC, OX            | 71,90,91    |
| 55 | Keratin, type I cytoskeletal 19                        | gi 6680606   | P19001 | ARC                | 92          |
| 56 | Laminin receptor                                       | gi 293694    | P14206 |                    |             |
| 57 | Major vault protein (MVP)                              | gi 17433104  | Q9EQK5 | ARC                | 93          |
| 58 | Malate dehydrogenase, cytoplasmic                      | gi 254540027 | P14152 |                    |             |
| 59 | Microtubule-associated protein, RP/EB family, member 1 | gi 7106301   | Q61166 | ARC                | 94          |
| 60 | Myosin light chain, regulatory B-like                  | gi 71037403  | Q6ZWQ9 | ARC                | 72          |
| 61 | N-acetyl-D-glucosamine kinase                          | gi 9506739   | Q9QZ08 |                    |             |
| 62 | NSFL1 cofactor p47                                     | gi 38198665  | Q9CZ44 | PBCF               | 95          |
| 63 | Nucleophosmin 1                                        | gi 55153941  | Q5U438 | RDP                | 96          |

|    |                                                               |              |        |               |         |
|----|---------------------------------------------------------------|--------------|--------|---------------|---------|
| 64 | p50b, Leukocyte-specific protein 1 (LSP1)                     | gi 728498    | P19973 | ARC, RDP, ROI | 97,98   |
| 65 | Peroxiredoxin 1                                               | gi 6754976   | P35700 | ROI, OX       | 99      |
| 66 | Peroxiredoxin 2                                               | gi 148747558 | Q61171 | OX            | 100     |
| 67 | Platelet-activating factor acetylhydrolase 1B subunit beta    | gi 40254624  | Q61206 |               |         |
| 68 | Prohibitin                                                    | gi 6679299   | P67778 | RDP           | 101     |
| 69 | Prolyl 4-hydroxylase, beta polypeptide precursor              | gi 42415475  | Q922C8 | PBCF          | 102     |
| 70 | Proteasome (prosome, macropain) 28 subunit, alpha             | gi 6755212   | P97371 | PBCF          | 103     |
| 71 | Proteasome alpha 1 subunit                                    | gi 33563282  | Q9R1P4 | PBCF, OX      | 104,105 |
| 72 | Protein CREG1                                                 | gi 6753520   | O88668 | RDP           | 106     |
| 73 | Protein disulfide isomerase associated 6 (PDI-P5)             | gi 60502437  | Q922R8 | PBCF, OX      | 107,108 |
| 74 | Protein disulfide-isomerase A3 precursor                      | gi 112293264 | P27773 | PBCF, OX      | 108,109 |
| 75 | Protein disulfide-isomerase A4                                | gi 86198316  | P08003 | PBCF, OX      | 108,110 |
| 76 | Protein synthesis initiation factor 4A                        | gi 556308    | P60843 | OX, RDP       | 71,111  |
| 77 | Purine nucleoside phosphorylase                               | gi 388921    | P23492 |               |         |
| 78 | Put. beta-actin (aa 27-375)                                   | gi 49868     | P60710 | ARC, OX       | 72,112  |
| 79 | Rab GDP dissociation inhibitor beta                           | gi 26348171  | Q61598 | ARC           | 113     |
| 80 | Rho GDP dissociation inhibitor (GDI) alpha                    | gi 31982030  | Q99PT1 | ARC           | 114     |
| 81 | Serine (or cysteine) proteinase inhibitor, clade B, member 1a | gi 114158675 | Q9D154 | PBCF          | 115     |
| 82 | Stress-70 protein, mitochondrial                              | gi 162461907 | P38647 | PBCF          | 116     |
| 83 | Translationally-controlled tumor protein TCTP)                | gi 6678437   | P63028 | PBCF          | 117     |
| 84 | Tropomodulin 3                                                | gi 8394460   | Q9JHJ0 | ARC           | 55      |
| 85 | Tropomyosin 3, gamma                                          | gi 40254525  | Q8K0Z5 | ARC           | 55      |
| 86 | Tubulin, beta-4B chain                                        | gi 22165384  | P68372 | ARC           |         |
| 87 | Tubulin, beta 5                                               | gi 7106439   | P99024 | ARC, OX       | 73,118  |
| 88 | Vacuolar adenosine triphosphatase subunit B                   | gi 1184661   | P62814 |               |         |
| 89 | Valosin-containing protein                                    | gi 6005942   | P55072 | ARC, OX, PBCF | 71,119  |
| 90 | Vimentin                                                      | gi 31982755  | P20152 | ARC, OX, ROI  | 71,120  |

List of proteins identified by 2D-DIGE by gel number with cross references to NCBI GI number, Swiss-Prot accession number, and functional protein categories (ARC, actin-related/cytoskeletal (n=38); OX, oxidative stress-related proteins (n=26); PBCF, protease balance/chaperone function (n=25); ROI, regulation of inflammation (n=19); and RDP, regulatory/ differentiative processes (n=15)). Classification into Functional Categories was based on information in the references cited (see reference list in manuscript).
