# Supplementary material
Source: PubMed Central journal article supplement (PMC4128237)

# Revised Supplementary File 7

KO Male + SP-A2 Treatment (10µg)

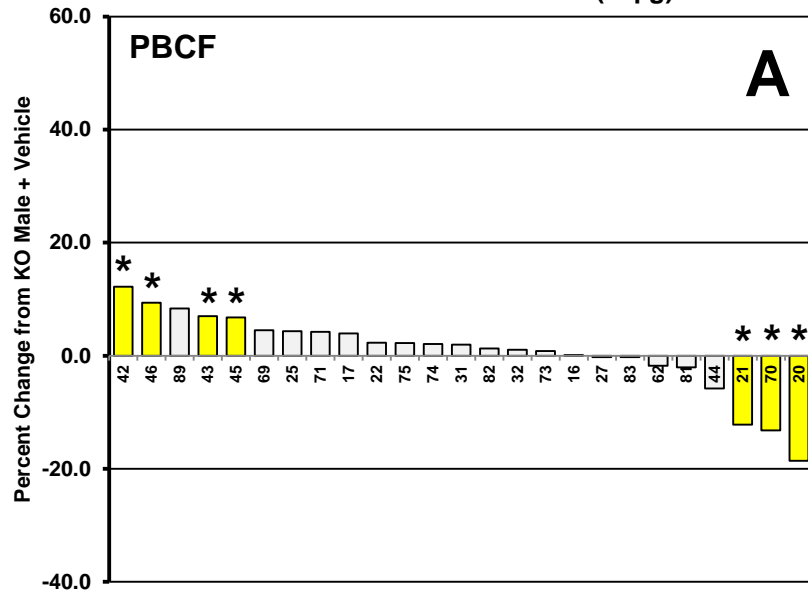

KO Female + SP-A2 Treatment (10µg)

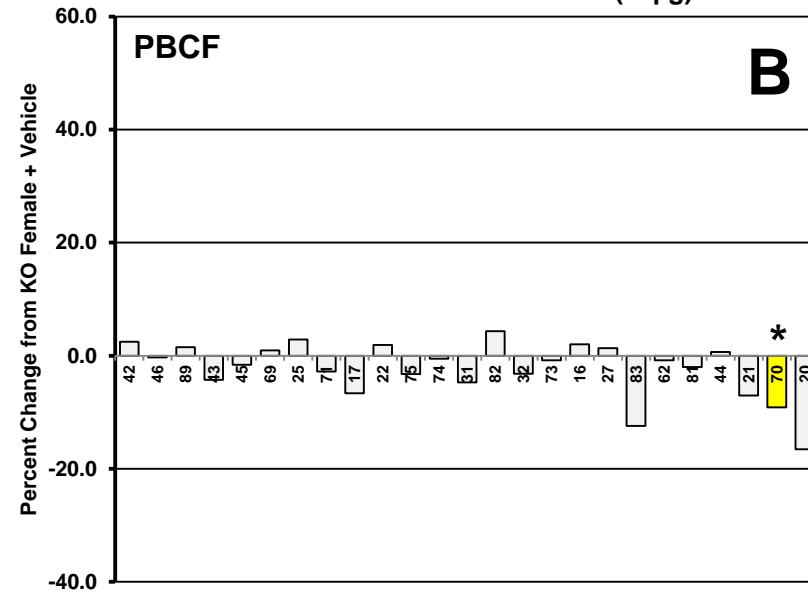

KO Male + SP-A1 Treatment (10µg)

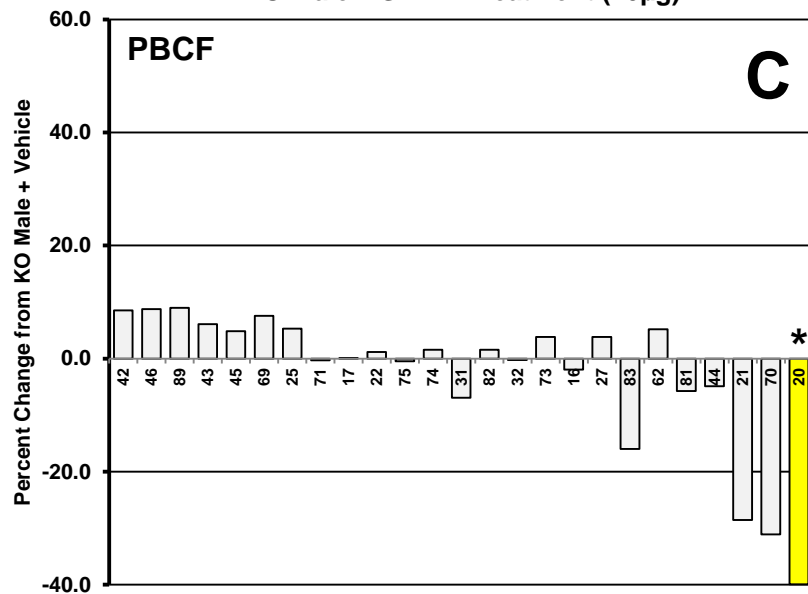

KO Female + SP-A1 Treatment (10µg)

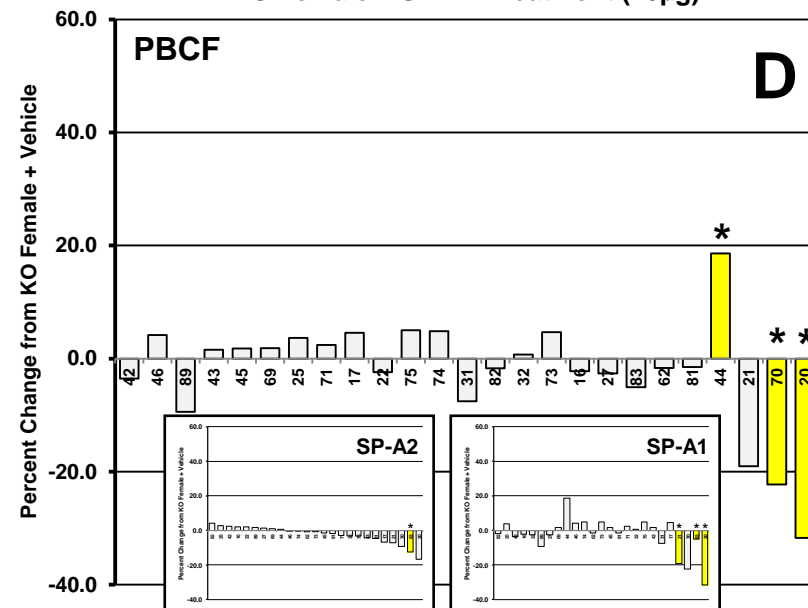

Supplement: NIHMS606506-supplement-07.pdf [file NIHMS606506-supplement-07.pdf]
