# Supplementary material
Source: PubMed Central journal article supplement (PMC4128237)
Supplement: NIHMS606506-supplement-13.pdf [file NIHMS606506-supplement-13.pdf]

Warning: This form is not supported with the current version of Acrobat or Adobe Reader.  
Upgrade to the latest version for full support.
