# Supplementary material
Source: PubMed Central journal article supplement (PMC4128237)

# Supplementary File 6

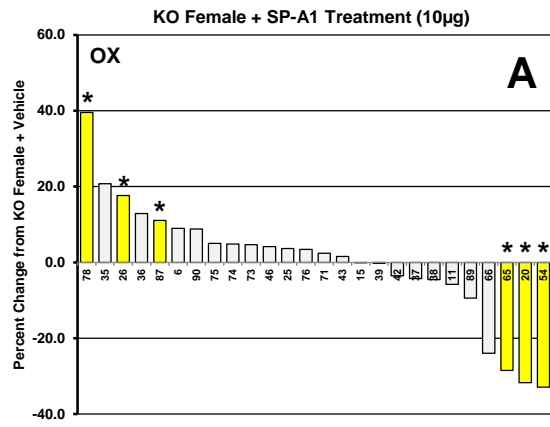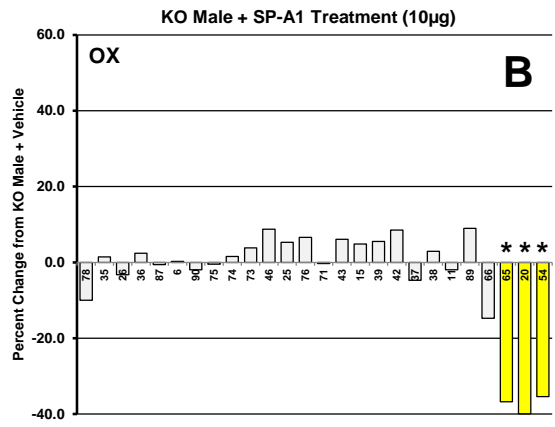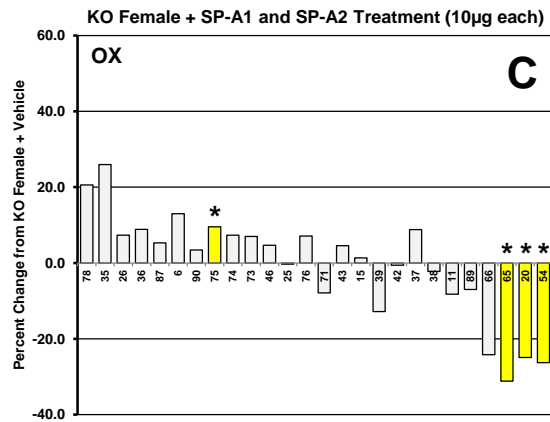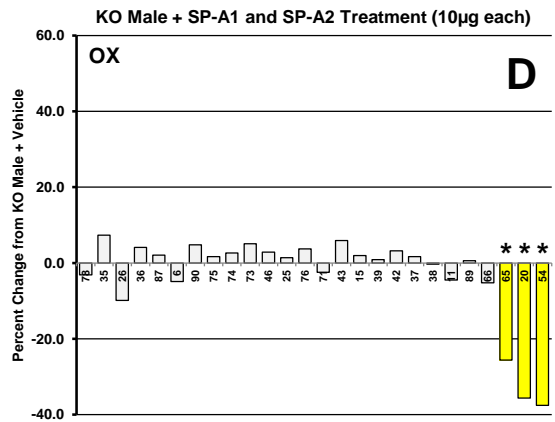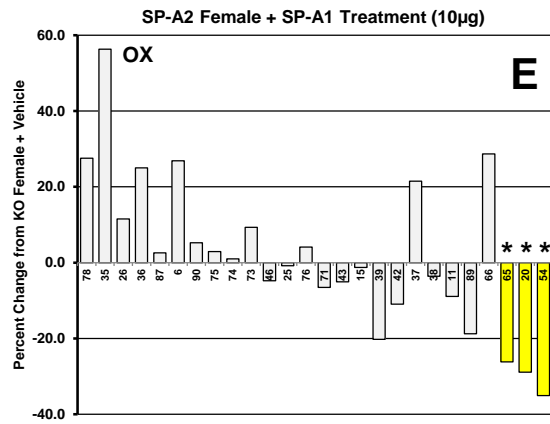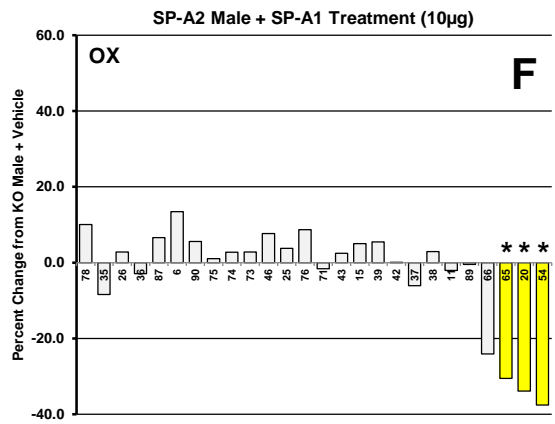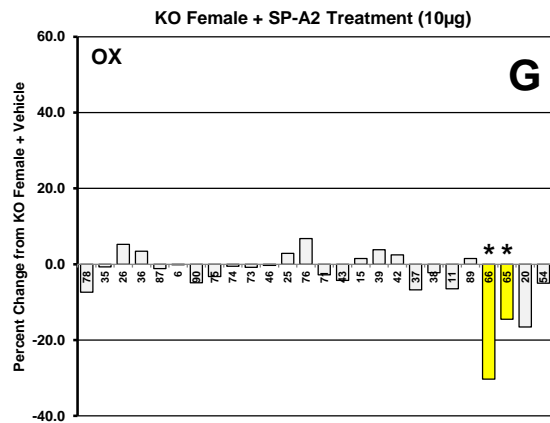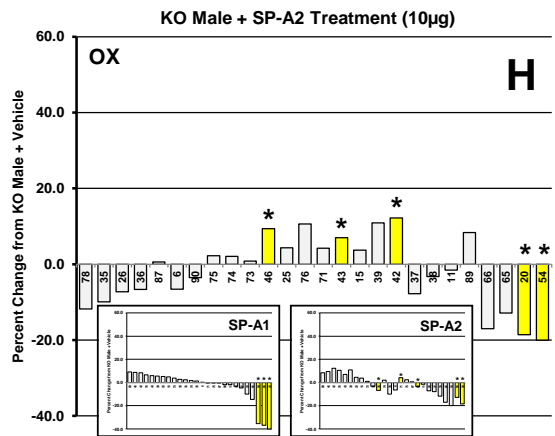

Supplement: NIHMS606506-supplement-06.pdf [file NIHMS606506-supplement-06.pdf]

# Supplementary File 8 (continued)

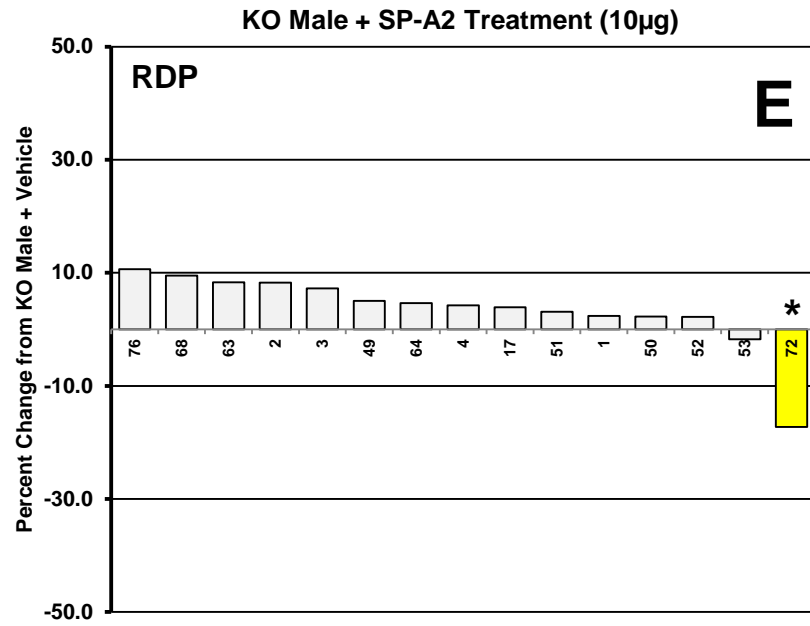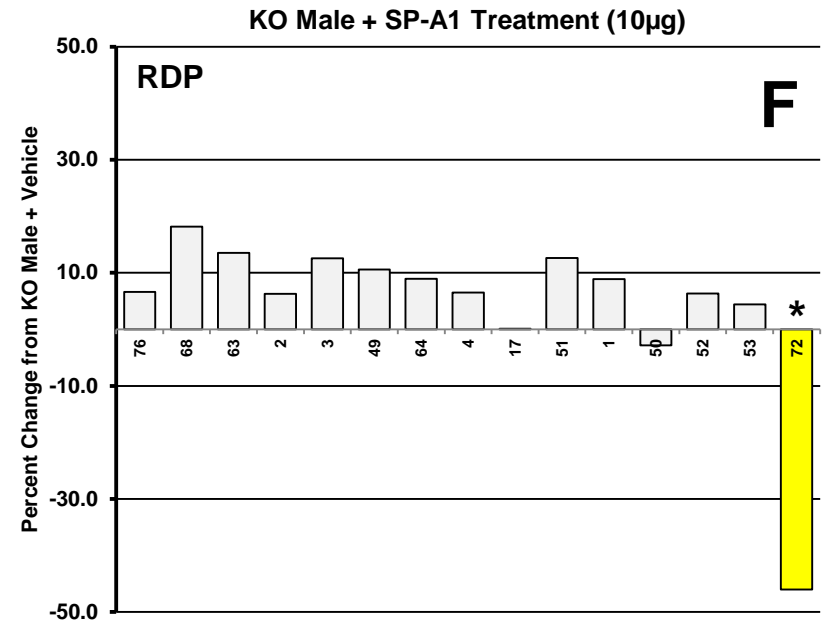

Supplement: NIHMS606506-supplement-09.pdf [file NIHMS606506-supplement-09.pdf]

# Revised Supplementary File 9

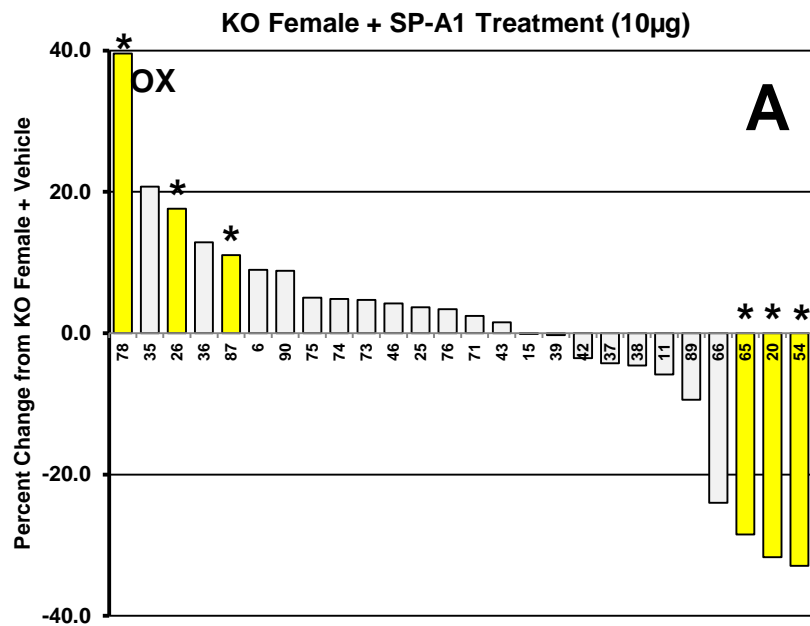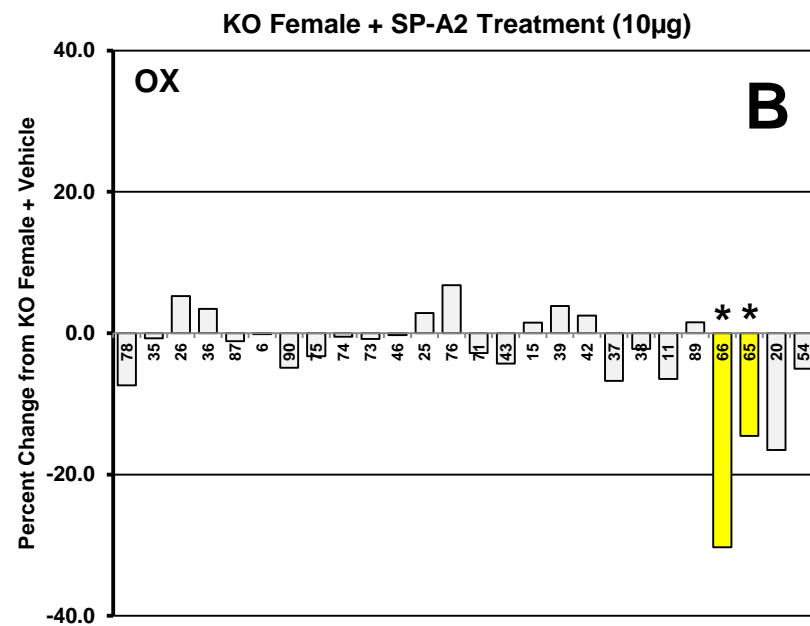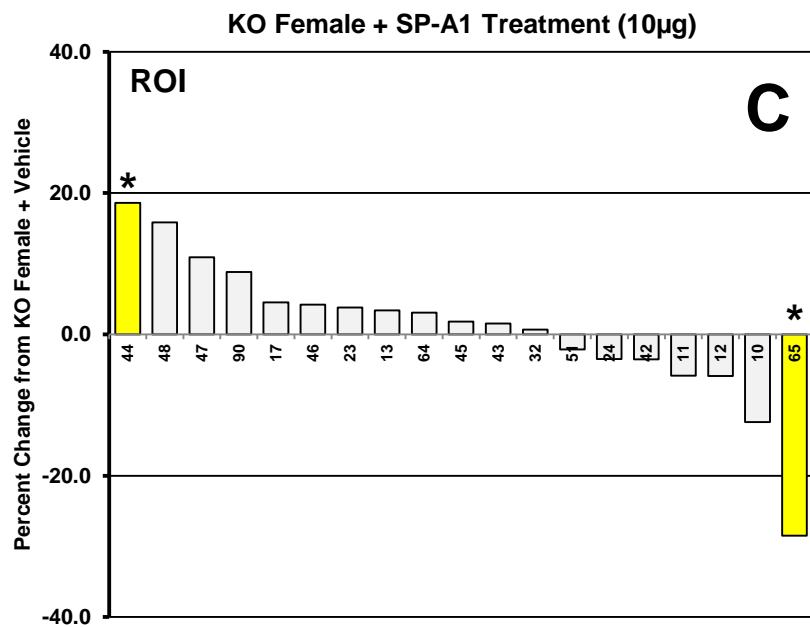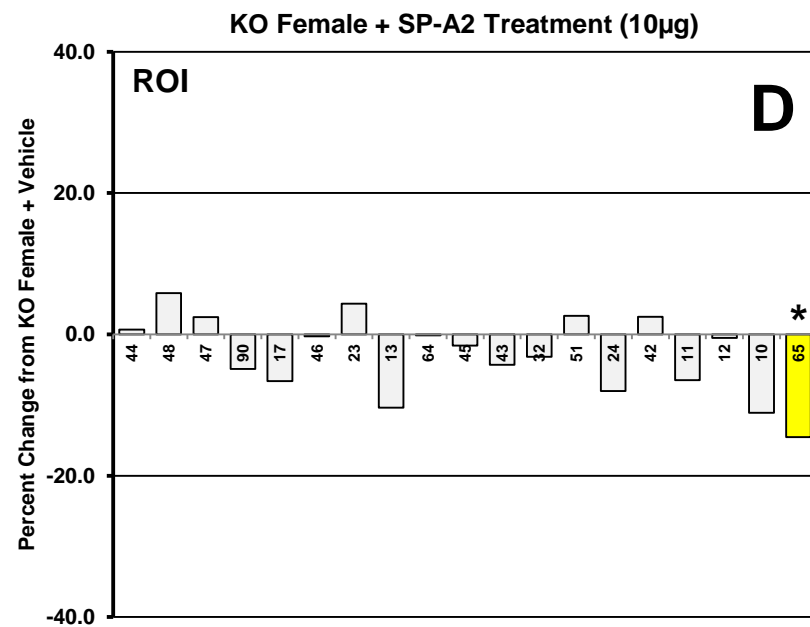

Supplement: NIHMS606506-supplement-10.pdf [file NIHMS606506-supplement-10.pdf]

# Revised Supplementary File 9 (continued)

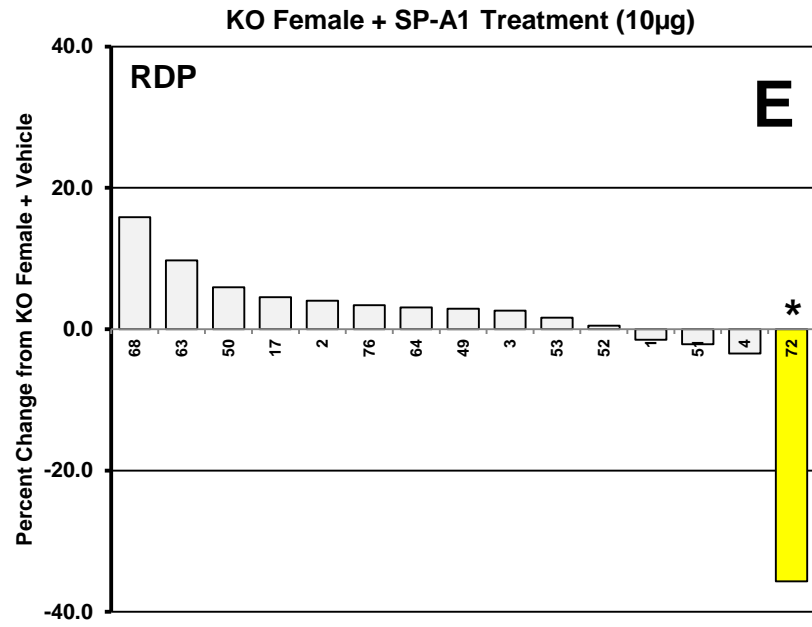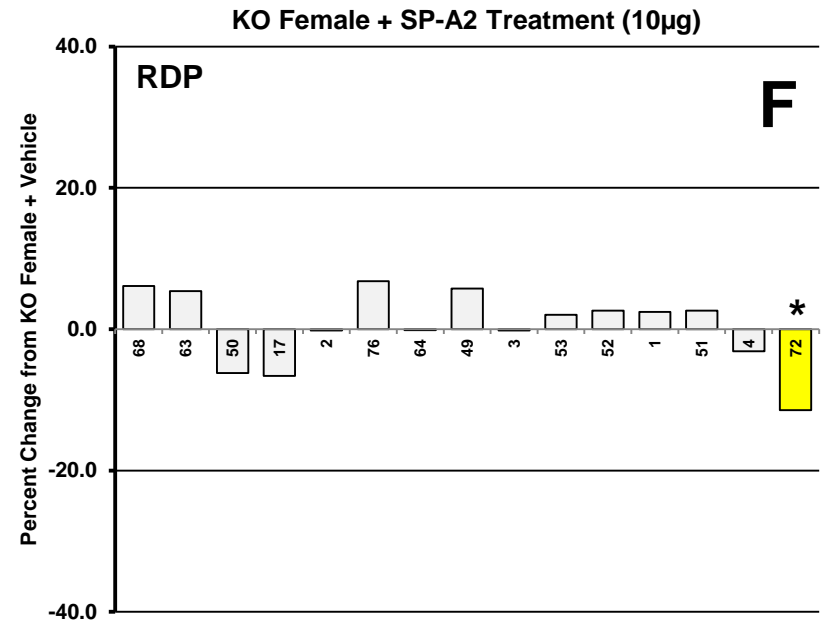

Supplement: NIHMS606506-supplement-11.pdf [file NIHMS606506-supplement-11.pdf]

# Revised Supplementary File 10

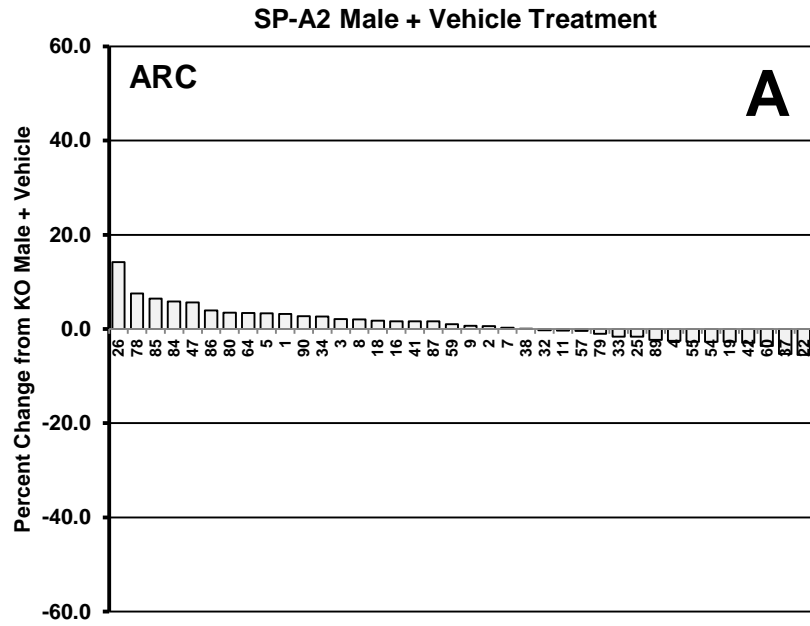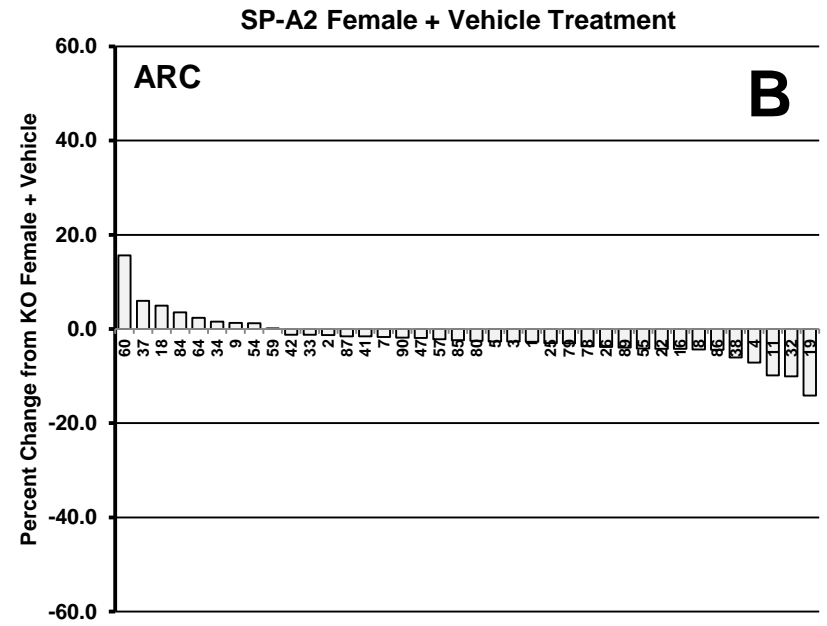

Supplement: NIHMS606506-supplement-12.pdf [file NIHMS606506-supplement-12.pdf]
